# Supplementary material for: Oncologic Benefit of Adjuvant Chemoradiation after D2 Gastrectomy: A Stepwise Hierarchical Pooled Analysis and Systematic Review
Source: MDPI journal article supplement (doi:10.3390/cancers12082125), 2020-07-31
Supplement: s1 [file s1]

# Supplementary Materials: Oncologic Benefit of Adjuvant Chemoradiation after D2 Gastrectomy: A Stepwise Hierarchical Pooled Analysis and Systematic Review

Chai Hong Rim, In-Soo Shin, Hye Yoon Lee, Won Sup Yoon and Sunmin Park

**Table S1.** Scoring sheet according to Newcastle-Ottawa scale.

| Author   | Selection                                |                                     |                           |                                                       | Comparability                                                   |                       | Outcome                                         |                                  | Overall Score<br>(9 to Be Full) |
|----------|------------------------------------------|-------------------------------------|---------------------------|-------------------------------------------------------|-----------------------------------------------------------------|-----------------------|-------------------------------------------------|----------------------------------|---------------------------------|
|          | 1                                        | 2                                   | 3                         | 4                                                     | 1                                                               | 1                     | 2                                               | 3                                |                                 |
|          | Representativeness of the exposed cohort | Selection of the non exposed cohort | Ascertainment of exposure | Outcome of interest was not present at start of study | Comparability of cohorts on the basis of the design or analysis | Assessment of outcome | Was follow-up long enough for outcomes to occur | Adequacy of follow up of cohorts |                                 |
| Markelis | 1                                        | 1                                   | 1                         | 1                                                     | 0                                                               | 1                     | 0                                               | 0                                | 5                               |
| Kwon     | 1                                        | 1                                   | 1                         | 1                                                     | 1                                                               | 1                     | 1                                               | 1                                | 8                               |
| Zhu      | 1                                        | 1                                   | 1                         | 1                                                     | 2                                                               | 1                     | 1                                               | 1                                | 9                               |
| Kim      | 1                                        | 1                                   | 1                         | 1                                                     | 2                                                               | 1                     | 1                                               | 1                                | 9                               |
| Park     | 1                                        | 1                                   | 1                         | 1                                                     | 2                                                               | 1                     | 1                                               | 1                                | 9                               |
| Kilic    | 1                                        | 1                                   | 1                         | 1                                                     | 0                                                               | 1                     | 0                                               | 1                                | 6                               |
| Lee      | 1                                        | 1                                   | 1                         | 1                                                     | 0                                                               | 1                     | 1                                               | 1                                | 7                               |
| Cao      | 1                                        | 1                                   | 1                         | 1                                                     | 2                                                               | 1                     | 1                                               | 1                                | 9                               |
| Turanli  | 1                                        | 1                                   | 1                         | 1                                                     | 1                                                               | 1                     | 1                                               | 1                                | 8                               |
| Yu       | 1                                        | 1                                   | 1                         | 1                                                     | 2                                                               | 1                     | 1                                               | 1                                | 9                               |
| Peng     | 1                                        | 1                                   | 1                         | 1                                                     | 1                                                               | 1                     | 1                                               | 1                                | 8                               |
| Li       | 1                                        | 1                                   | 1                         | 1                                                     | 1                                                               | 1                     | 1                                               | 1                                | 8                               |
| Ma       | 1                                        | 1                                   | 1                         | 1                                                     | 1                                                               | 1                     | 1                                               | 1                                | 8                               |

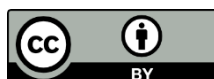

© 2020 by the authors. Licensee MDPI, Basel, Switzerland. This article is an open access article distributed under the terms and conditions of the Creative Commons Attribution (CC BY) license (<http://creativecommons.org/licenses/by/4.0/>).
